# Supplementary material for: Psychometric properties of disease-specific health-related quality of life (HRQoL) instruments for food allergy and food intolerance: protocol for a COSMIN-based systematic review
Source: HighWire-hosted journal article supplement (doi:10.1136/bmjopen-2021-053534), 2022-01-01
Supplement: bmjopen-2021-053534supp003_data_supplement.pdf [file bmjopen-2021-053534supp003_data_supplement.pdf]

## COSMIN content validity methodology

### Instructions for completing the COSMIN boxes for content validity

- 1 CHECK the COSMIN website if the quality of the PROM development was already rated in another review. In that case, you can skip box 1A and use the quality
- 2 We recommend to score all PROMS with two raters, independently, and reach consensus afterwards. You can change "rater 1" and "rater 2" into the names of the raters
- 4 Add extra rows, columns or tables if needed
- 5 Tables 1, 2, and 3 will be filled automatically (you may need to add links to the other tabs). They can be included in a systematic review

### COSMIN box 1. Standards for evaluating the quality of PROM development

*Check the COSMIN website to see if the quality of the PROM development was already rated in another review*

Ratings: V= very good; A = adequate; D = doubtful; I = inadequate; N= not applicable

|                                                                                                                                                                      | PROM    |         |           | PROM    |         |           | PROM    |         |           |
|----------------------------------------------------------------------------------------------------------------------------------------------------------------------|---------|---------|-----------|---------|---------|-----------|---------|---------|-----------|
|                                                                                                                                                                      | ref     |         |           | ref     |         |           | ref     |         |           |
| <b>1a. PROM design</b>                                                                                                                                               |         |         |           |         |         |           |         |         |           |
| <i>General design requirements</i>                                                                                                                                   | Rater 1 | Rater 2 | Consensus | Rater 1 | Rater 2 | Consensus | Rater 1 | Rater 2 | Consensus |
| 1 Is a clear description provided of the construct to be measured?                                                                                                   |         |         |           |         |         |           |         |         |           |
| 2 Is the origin of the construct clear: was a theory, conceptual framework or disease model used or clear rationale provided to define the construct to be measured? |         |         |           |         |         |           |         |         |           |
| 3 Is a clear description provided of the target population for which the PROM was                                                                                    |         |         |           |         |         |           |         |         |           |
| 4 Is a clear description provided of the context of use (i.e. discriminative, evaluative                                                                             |         |         |           |         |         |           |         |         |           |
| 5 Was the PROM development study performed in a sample representing the target population for which the PROM was developed?                                          |         |         |           |         |         |           |         |         |           |
|                                                                                                                                                                      |         |         |           |         |         |           |         |         |           |
| <i>Concept elicitation (relevance and comprehensiveness)</i>                                                                                                         | Rater 1 | Rater 2 | Consensus | Rater 1 | Rater 2 | Consensus | Rater 1 | Rater 2 | Consensus |
| 6 Was an appropriate qualitative data collection method used to identify relevant items for                                                                          |         |         |           |         |         |           |         |         |           |
| 7 Were skilled group moderators/ interviewers used?                                                                                                                  |         |         |           |         |         |           |         |         |           |
| 8 Were the group meetings or interviews based on an appropriate topic or interview guide?                                                                            |         |         |           |         |         |           |         |         |           |
| 9 Were the group meetings or interviews recorded and transcribed verbatim?                                                                                           |         |         |           |         |         |           |         |         |           |
| 10 Was an appropriate approach used to analyse the data?                                                                                                             |         |         |           |         |         |           |         |         |           |
| 11 Was at least part of the data coded independently?                                                                                                                |         |         |           |         |         |           |         |         |           |
| 12 Was data collection continued until saturation was reached?                                                                                                       |         |         |           |         |         |           |         |         |           |
| 13 For quantitative studies: was the sample size appropriate?                                                                                                        |         |         |           |         |         |           |         |         |           |
| <b>SUBTOTAL QUALITY CONCEPT ELICITATION STUDY</b> <i>Lowest score of items 6-13</i>                                                                                  |         |         |           |         |         |           |         |         |           |
|                                                                                                                                                                      |         |         |           |         |         |           |         |         |           |
| <b>TOTAL QUALITY OF THE PROM DESIGN</b> <i>Lowest score of items 1-13</i>                                                                                            |         |         |           |         |         |           |         |         |           |

### 1b. Cognitive interview study or other pilot test

|                                                                                                                    |         |         |           |         |         |           |         |         |           |
|--------------------------------------------------------------------------------------------------------------------|---------|---------|-----------|---------|---------|-----------|---------|---------|-----------|
| 14 Was a cognitive interview study or other pilot test performed? <i>If NO skip items 15-35</i>                    | Rater 1 | Rater 2 | Consensus | Rater 1 | Rater 2 | Consensus | Rater 1 | Rater 2 | Consensus |
|                                                                                                                    |         |         |           |         |         |           |         |         |           |
| <i>General design requirements</i>                                                                                 | Rater 1 | Rater 2 | Consensus | Rater 1 | Rater 2 | Consensus | Rater 1 | Rater 2 | Consensus |
| 15 Was the cognitive interview study or other pilot test performed in a sample representing the target population? |         |         |           |         |         |           |         |         |           |
|                                                                                                                    |         |         |           |         |         |           |         |         |           |
| <i>Comprehensibility</i>                                                                                           | Rater 1 | Rater 2 | Consensus | Rater 1 | Rater 2 | Consensus | Rater 1 | Rater 2 | Consensus |
| 16 Were patients asked about the <u>comprehensibility</u> of the PROM? <i>If NO or not clear, skip</i>             |         |         |           |         |         |           |         |         |           |
|                                                                                                                    | Rater 1 | Rater 2 | Consensus | Rater 1 | Rater 2 | Consensus | Rater 1 | Rater 2 | Consensus |
| 17 Were all items tested in their final form?                                                                      |         |         |           |         |         |           |         |         |           |
| 18 Was an appropriate qualitative method used to assess the <u>comprehensibility</u> of the PROM                   |         |         |           |         |         |           |         |         |           |
| 19 Was each item tested in an appropriate number of patients?                                                      |         |         |           |         |         |           |         |         |           |
| 20 Were skilled interviewers used?                                                                                 |         |         |           |         |         |           |         |         |           |
| 21 Were the interviews based on an appropriate interview guide?                                                    |         |         |           |         |         |           |         |         |           |
| 22 Were the interviews recorded and transcribed verbatim?                                                          |         |         |           |         |         |           |         |         |           |
| 23 Was an appropriate approach used to analyse the data?                                                           |         |         |           |         |         |           |         |         |           |
| 24 Were at least two researchers involved in the analysis?                                                         |         |         |           |         |         |           |         |         |           |

|                                                                                           |                                                                                                                                                                  |                |                |                  |                |                |                  |                |                |                  |
|-------------------------------------------------------------------------------------------|------------------------------------------------------------------------------------------------------------------------------------------------------------------|----------------|----------------|------------------|----------------|----------------|------------------|----------------|----------------|------------------|
| 25                                                                                        | Were problems regarding the comprehensibility of the PROM instructions, items, response options, and recall period appropriately addressed by adapting the PROM? |                |                |                  |                |                |                  |                |                |                  |
| <b>SUBTOTAL QUALITY OF COMPREHENSIBILITY STUDY</b> <i>Lowest score of items 15-25</i>     |                                                                                                                                                                  |                |                |                  |                |                |                  |                |                |                  |
| <i>Comprehensiveness</i>                                                                  |                                                                                                                                                                  | <b>Rater 1</b> | <b>Rater 2</b> | <b>Consensus</b> | <b>Rater 1</b> | <b>Rater 2</b> | <b>Consensus</b> | <b>Rater 1</b> | <b>Rater 2</b> | <b>Consensus</b> |
| 26                                                                                        | Were patients asked about the <u>comprehensiveness</u> of the PROM? <i>If NO or not clear, skip items 27-35</i>                                                  |                |                |                  |                |                |                  |                |                |                  |
| 27                                                                                        | Was the final set of items tested?                                                                                                                               |                |                |                  |                |                |                  |                |                |                  |
| 28                                                                                        | Was an appropriate method used for assessing the comprehensiveness_of the PROM?                                                                                  |                |                |                  |                |                |                  |                |                |                  |
| 29                                                                                        | Was each item tested in an appropriate number of patients?                                                                                                       |                |                |                  |                |                |                  |                |                |                  |
| 30                                                                                        | Were skilled interviewers used?                                                                                                                                  |                |                |                  |                |                |                  |                |                |                  |
| 31                                                                                        | Were the interviews based on an appropriate interview guide?                                                                                                     |                |                |                  |                |                |                  |                |                |                  |
| 32                                                                                        | Were the interviews recorded and transcribed verbatim?                                                                                                           |                |                |                  |                |                |                  |                |                |                  |
| 33                                                                                        | Was an appropriate approach used to analyse the data?                                                                                                            |                |                |                  |                |                |                  |                |                |                  |
| 34                                                                                        | Were at least two researchers involved in the analysis?                                                                                                          |                |                |                  |                |                |                  |                |                |                  |
| 35                                                                                        | Were problems regarding the <u>comprehensiveness</u> of the PROM appropriately addressed by adapting the PROM?                                                   |                |                |                  |                |                |                  |                |                |                  |
| <b>SUBTOTAL QUALITY OF COMPREHENSIVENESS STUDY</b> <i>Lowest score of items 15, 26-35</i> |                                                                                                                                                                  |                |                |                  |                |                |                  |                |                |                  |
| <b>TOTAL QUALITY OF THE PILOT STUDY</b> <i>Lowest score of items 14-35</i>                |                                                                                                                                                                  |                |                |                  |                |                |                  |                |                |                  |
| <b>TOTAL QUALITY OF THE PROM DEVELOPMENT STUDY</b> <i>Lowest score of items 1-35</i>      |                                                                                                                                                                  |                |                |                  |                |                |                  |                |                |                  |

## COSMIN box 2. Standards for evaluating the quality of content validity studies of PROMs

*Only those parts of the box need to be completed for which information is available*

Score: V= very good; A = adequate; D = doubtful; I = inadequate; N= not applicable

|                                                                                       |                                                                                                                                                             | PROM    |         |           | PROM    |         |           | PROM    |         |           |
|---------------------------------------------------------------------------------------|-------------------------------------------------------------------------------------------------------------------------------------------------------------|---------|---------|-----------|---------|---------|-----------|---------|---------|-----------|
|                                                                                       |                                                                                                                                                             | ref     |         |           | ref     |         |           | ref     |         |           |
|                                                                                       |                                                                                                                                                             | rater 1 | rater 2 | Consensus | rater 1 | rater 2 | Consensus | rater 1 | rater 2 | Consensus |
| <b>2a. Asking patient about relevance</b>                                             |                                                                                                                                                             |         |         |           |         |         |           |         |         |           |
| 1                                                                                     | Was an appropriate method used to ask patients whether each item is <u>relevant</u> for their experience with the condition?                                |         |         |           |         |         |           |         |         |           |
| 2                                                                                     | Was each item tested in an appropriate number of patients?                                                                                                  |         |         |           |         |         |           |         |         |           |
| 3                                                                                     | Were skilled group moderators/interviewers used?                                                                                                            |         |         |           |         |         |           |         |         |           |
| 4                                                                                     | Were the group meetings or interviews based on an appropriate topic or interview guide?                                                                     |         |         |           |         |         |           |         |         |           |
| 5                                                                                     | Were the group meetings or interviews recorded and transcribed verbatim?                                                                                    |         |         |           |         |         |           |         |         |           |
| 6                                                                                     | Was an appropriate approach used to analyse the data?                                                                                                       |         |         |           |         |         |           |         |         |           |
| 7                                                                                     | Were at least two researchers involved in the analysis?                                                                                                     |         |         |           |         |         |           |         |         |           |
| <b>SUBTOTAL QUALITY OF RELEVANCE STUDY</b> <i>Lowest score of items 1-7</i>           |                                                                                                                                                             |         |         |           |         |         |           |         |         |           |
| <b>2b. Asking patients about comprehensiveness</b>                                    |                                                                                                                                                             |         |         |           |         |         |           |         |         |           |
| 8                                                                                     | Was an appropriate method used for assessing the <u>comprehensiveness</u> of the PROM?                                                                      |         |         |           |         |         |           |         |         |           |
| 9                                                                                     | Was each item tested in an appropriate number of patients?                                                                                                  |         |         |           |         |         |           |         |         |           |
| 10                                                                                    | Were skilled group moderators/interviewers used?                                                                                                            |         |         |           |         |         |           |         |         |           |
| 11                                                                                    | Were the group meetings or interviews based on an appropriate topic or interview guide?                                                                     |         |         |           |         |         |           |         |         |           |
| 12                                                                                    | Were the group meetings or interviews recorded and transcribed verbatim?                                                                                    |         |         |           |         |         |           |         |         |           |
| 13                                                                                    | Was an appropriate approach used to analyse the data?                                                                                                       |         |         |           |         |         |           |         |         |           |
| 14                                                                                    | Were at least two researchers involved in the analysis?                                                                                                     |         |         |           |         |         |           |         |         |           |
| <b>SUBTOTAL QUALITY OF COMPREHENSIVENESS STUDY</b> <i>Lowest score of items 8-14</i>  |                                                                                                                                                             |         |         |           |         |         |           |         |         |           |
| <b>2c. Asking patients about comprehensibility</b>                                    |                                                                                                                                                             |         |         |           |         |         |           |         |         |           |
| 15                                                                                    | Was an appropriate qualitative method used for assessing the <u>comprehensibility</u> of the PROM instructions, items, response options, and recall period? |         |         |           |         |         |           |         |         |           |
| 16                                                                                    | Was each item tested in an appropriate number of patients?                                                                                                  |         |         |           |         |         |           |         |         |           |
| 17                                                                                    | Were skilled group moderators/interviewers used?                                                                                                            |         |         |           |         |         |           |         |         |           |
| 18                                                                                    | Were the group meetings or interviews based on an appropriate topic or interview guide?                                                                     |         |         |           |         |         |           |         |         |           |
| 19                                                                                    | Were the group meetings or interviews recorded and transcribed verbatim?                                                                                    |         |         |           |         |         |           |         |         |           |
| 20                                                                                    | Was an appropriate approach used to analyse the data?                                                                                                       |         |         |           |         |         |           |         |         |           |
| 21                                                                                    | Were at least two researchers involved in the analysis?                                                                                                     |         |         |           |         |         |           |         |         |           |
| <b>SUBTOTAL QUALITY OF COMPREHENSIBILITY STUDY</b> <i>Lowest score of items 15-21</i> |                                                                                                                                                             |         |         |           |         |         |           |         |         |           |
| <b>2d. Asking professionals about relevance</b>                                       |                                                                                                                                                             |         |         |           |         |         |           |         |         |           |
| 22                                                                                    | Was an appropriate method used to ask professionals whether each item is <u>relevant</u> for the construct of interest?                                     |         |         |           |         |         |           |         |         |           |
| 23                                                                                    | Were professionals from all relevant disciplines included?                                                                                                  |         |         |           |         |         |           |         |         |           |
| 24                                                                                    | Was each item tested in an appropriate number of professionals?                                                                                             |         |         |           |         |         |           |         |         |           |
| 25                                                                                    | Was an appropriate approach used to analyse the data?                                                                                                       |         |         |           |         |         |           |         |         |           |
| 26                                                                                    | Were at least two researchers involved in the analysis?                                                                                                     |         |         |           |         |         |           |         |         |           |
| <b>SUBTOTAL QUALITY OF RELEVANCE STUDY</b> <i>Lowest score of items 22-26</i>         |                                                                                                                                                             |         |         |           |         |         |           |         |         |           |

| <b>2e. Asking professionals about comprehensiveness</b>                               |                                                                                        | rater 1 | rater 2 | Consensus | rater 1 | rater 2 | Consensus | rater 1 | rater 2 | Consensus |
|---------------------------------------------------------------------------------------|----------------------------------------------------------------------------------------|---------|---------|-----------|---------|---------|-----------|---------|---------|-----------|
| 27                                                                                    | Was an appropriate method used for assessing the <u>comprehensiveness</u> of the PROM? |         |         |           |         |         |           |         |         |           |
| 28                                                                                    | Were professionals from all relevant disciplines included?                             |         |         |           |         |         |           |         |         |           |
| 29                                                                                    | Was each item tested in an appropriate number of professionals?                        |         |         |           |         |         |           |         |         |           |
| 30                                                                                    | Was an appropriate approach used to analyse the data?                                  |         |         |           |         |         |           |         |         |           |
| 31                                                                                    | Were at least two researchers involved in the analysis?                                |         |         |           |         |         |           |         |         |           |
| <b>SUBTOTAL QUALITY OF COMPREHENSIVENESS STUDY</b> <i>Lowest score of items 27-31</i> |                                                                                        |         |         |           |         |         |           |         |         |           |

**Rating the content validity of the PROM**

Complete one table per PROM (subscale)

**Criteria for content validity**

To fill in ratings use apostrophe (') before the + / - / ± / ? signs

Score: + = sufficient; - = insufficient; ? = indeterminate; ± = inconsistent

| PROM (subscale)                                                                                 | PROM development study | PROM development study | PROM development study | Content validity study 1 | Content validity study 1 | Content validity study 1 | Content validity study 2 <sup>2</sup> | Content validity study 2 <sup>2</sup> | Content validity study 2 <sup>2</sup> | Rating of reviewers | Rating of reviewers | Rating of reviewers | OVERALL RATINGS PER PROM <sup>3</sup> | OVERALL RATINGS PER PROM <sup>3</sup> | OVERALL RATINGS PER PROM <sup>3</sup> | QUALITY OF EVIDENCE           | QUALITY OF EVIDENCE           | QUALITY OF EVIDENCE           |
|-------------------------------------------------------------------------------------------------|------------------------|------------------------|------------------------|--------------------------|--------------------------|--------------------------|---------------------------------------|---------------------------------------|---------------------------------------|---------------------|---------------------|---------------------|---------------------------------------|---------------------------------------|---------------------------------------|-------------------------------|-------------------------------|-------------------------------|
|                                                                                                 | (+ / - / ± / ?)        | (+ / - / ± / ?)        | (+ / - / ± / ?)        | (+ / - / ± / ?)          | (+ / - / ± / ?)          | (+ / - / ± / ?)          | (+ / - / ± / ?)                       | (+ / - / ± / ?)                       | (+ / - / ± / ?)                       | (+ / - / ± / ?)     | (+ / - / ± / ?)     | (+ / - / ± / ?)     | + / - / ±                             | + / - / ±                             | + / - / ±                             | High, moderate, low, very low | High, moderate, low, very low | High, moderate, low, very low |
|                                                                                                 | rater 1                | rater 2                | consensus              | rater 1                  | rater 2                  | consensus                | rater 1                               | rater 2                               | consensus                             | rater 1             | rater 2             | consensus           | rater 1                               | rater 2                               | consensus                             | rater 1                       | rater 2                       | consensus                     |
| <b>Relevance</b>                                                                                |                        |                        |                        |                          |                          |                          |                                       |                                       |                                       |                     |                     |                     |                                       |                                       |                                       |                               |                               |                               |
| 1 Are the included items relevant for the construct of interest? <sup>1</sup>                   |                        |                        |                        |                          |                          |                          |                                       |                                       |                                       |                     |                     |                     |                                       |                                       |                                       |                               |                               |                               |
| 2 Are the included items relevant for the target population of interest? <sup>1</sup>           |                        |                        |                        |                          |                          |                          |                                       |                                       |                                       |                     |                     |                     |                                       |                                       |                                       |                               |                               |                               |
| 3 Are the included items relevant for the context of use of interest? <sup>1</sup>              |                        |                        |                        |                          |                          |                          |                                       |                                       |                                       |                     |                     |                     |                                       |                                       |                                       |                               |                               |                               |
| 4 Are the response options appropriate?                                                         |                        |                        |                        |                          |                          |                          |                                       |                                       |                                       |                     |                     |                     |                                       |                                       |                                       |                               |                               |                               |
| 5 Is the recall period appropriate?                                                             |                        |                        |                        |                          |                          |                          |                                       |                                       |                                       |                     |                     |                     |                                       |                                       |                                       |                               |                               |                               |
| <b>RELEVANCE RATING (+ / - / ± / ?)</b>                                                         |                        |                        |                        |                          |                          |                          |                                       |                                       |                                       |                     |                     |                     |                                       |                                       |                                       |                               |                               |                               |
| <b>Comprehensiveness</b>                                                                        |                        |                        |                        |                          |                          |                          |                                       |                                       |                                       |                     |                     |                     |                                       |                                       |                                       |                               |                               |                               |
| 6 Are all key concepts included?                                                                |                        |                        |                        |                          |                          |                          |                                       |                                       |                                       |                     |                     |                     |                                       |                                       |                                       |                               |                               |                               |
| <b>COMPREHENSIVENESS RATING (+ / - / ± / ?)</b>                                                 |                        |                        |                        |                          |                          |                          |                                       |                                       |                                       |                     |                     |                     |                                       |                                       |                                       |                               |                               |                               |
| <b>Comprehensibility</b>                                                                        |                        |                        |                        |                          |                          |                          |                                       |                                       |                                       |                     |                     |                     |                                       |                                       |                                       |                               |                               |                               |
| 7 Are the PROM instructions understood by the population of interest as intended?               |                        |                        |                        |                          |                          |                          |                                       |                                       |                                       |                     |                     |                     |                                       |                                       |                                       |                               |                               |                               |
| 8 Are the PROM items and response options understood by the population of interest as intended? |                        |                        |                        |                          |                          |                          |                                       |                                       |                                       |                     |                     |                     |                                       |                                       |                                       |                               |                               |                               |
| 9 Are the PROM items appropriately worded?                                                      |                        |                        |                        |                          |                          |                          |                                       |                                       |                                       |                     |                     |                     |                                       |                                       |                                       |                               |                               |                               |
| 10 Do the response options match the question?                                                  |                        |                        |                        |                          |                          |                          |                                       |                                       |                                       |                     |                     |                     |                                       |                                       |                                       |                               |                               |                               |
| <b>COMPREHENSIBILITY RATING (+ / - / ± / ?)</b>                                                 |                        |                        |                        |                          |                          |                          |                                       |                                       |                                       |                     |                     |                     |                                       |                                       |                                       |                               |                               |                               |
| <b>CONTENT VALIDITY RATING (+ / - / ± / ?)</b>                                                  |                        |                        |                        |                          |                          |                          |                                       |                                       |                                       |                     |                     |                     |                                       |                                       |                                       |                               |                               |                               |

<sup>1</sup> These criteria refer to the construct, population, and context of use of interest in the systematic review.

<sup>2</sup> Add more columns if more content validity studies are available

<sup>3</sup> If ratings are inconsistent between studies, consider using separate tables for subgroups of studies with consistent results.

### COSMIN Risk of Bias checklist

*Only those parts of the boxes need to be completed for which information is available*

Score: V= very good; A = adequate; D = doubtful; I = inadequate; N= not applicable

| Article reference:                                                                                                                        | PROM    |         |           | PROM    |         |           | PROM    |         |           |
|-------------------------------------------------------------------------------------------------------------------------------------------|---------|---------|-----------|---------|---------|-----------|---------|---------|-----------|
|                                                                                                                                           | ref     |         |           | ref     |         |           | ref     |         |           |
| <b>3. Structural validity</b>                                                                                                             | rater 1 | rater 2 | Consensus | rater 1 | rater 2 | Consensus | rater 1 | rater 2 | Consensus |
| unidimensionality or structural validity?                                                                                                 |         |         |           |         |         |           |         |         |           |
| 1 For CTT: Was exploratory or confirmatory factor analysis performed?                                                                     |         |         |           |         |         |           |         |         |           |
| 2 For IRT/Rasch: does the chosen model fit to the research question?                                                                      |         |         |           |         |         |           |         |         |           |
| 3 Was the sample size included in the analysis adequate?                                                                                  |         |         |           |         |         |           |         |         |           |
| 4 Were there any other important flaws?                                                                                                   |         |         |           |         |         |           |         |         |           |
| <b>TOTAL Lowest score of items 1-4</b>                                                                                                    |         |         | V         |         |         |           |         |         |           |
| <b>4. Internal consistency</b>                                                                                                            | rater 1 | rater 2 | Consensus | rater 1 | rater 2 | Consensus | rater 1 | rater 2 | Consensus |
| 1 Was an internal consistency statistic calculated for each unidimensional (sub)scale separately?                                         |         |         |           |         |         |           |         |         |           |
| 2 For continuous scores: Was Cronbach' s alpha or omega calculated?                                                                       |         |         |           |         |         |           |         |         |           |
| 3 For dichotomous scores: Was Cronbach' s alpha or KR-20 calculated?                                                                      |         |         |           |         |         |           |         |         |           |
| 4 For IRT-based scores: Was standard error of the theta (θ) or reliability coefficient of estimated latent trait value (index of (subject |         |         |           |         |         |           |         |         |           |
| 5 Were there any other important flaws?                                                                                                   |         |         |           |         |         |           |         |         |           |
| <b>TOTAL Lowest score of items 1-5</b>                                                                                                    |         |         | V         |         |         |           |         |         |           |
| <b>5. Cross-cultural validity\measurement invariance</b>                                                                                  | rater 1 | rater 2 | Consensus | rater 1 | rater 2 | Consensus | rater 1 | rater 2 | Consensus |
| 1 Were the samples similar for relevant characteristics except for the group                                                              |         |         |           |         |         |           |         |         |           |
| 2 Was an adequate approach used to analyse the data?                                                                                      |         |         |           |         |         |           |         |         |           |
| 3 Was the sample size included in the analysis adequate?                                                                                  |         |         |           |         |         |           |         |         |           |
| 4 Were there any other important flaws?                                                                                                   |         |         |           |         |         |           |         |         |           |
| <b>TOTAL Lowest score of items 1-4</b>                                                                                                    |         |         | V         |         |         |           |         |         |           |
| <b>6. Reliability</b>                                                                                                                     | rater 1 | rater 2 | Consensus | rater 1 | rater 2 | Consensus | rater 1 | rater 2 | Consensus |
| 1 Were patients stable in the interim period on the construct to be measured?                                                             |         |         |           |         |         |           |         |         |           |
| 2 Was the time interval appropriate?                                                                                                      |         |         |           |         |         |           |         |         |           |
| 3 Were the test conditions similar for the measurements? e.g. type of administration, environment, instructions                           |         |         |           |         |         |           |         |         |           |
| 4 For continuous scores: Was an intraclass correlation coefficient (ICC) calculated?                                                      |         |         |           |         |         |           |         |         |           |
| 5 For dichotomous/nominal/ordinal scores: Was kappa calculated?                                                                           |         |         |           |         |         |           |         |         |           |
| 6 For ordinal scores: Was a weighted kappa calculated?                                                                                    |         |         |           |         |         |           |         |         |           |
| 7 For ordinal scores: Was the weighting scheme described? e.g. linear, quadratic                                                          |         |         |           |         |         |           |         |         |           |
| 8 Were there any other important flaws?                                                                                                   |         |         |           |         |         |           |         |         |           |
| <b>TOTAL Lowest score of items 1-8</b>                                                                                                    |         |         | V         |         |         |           |         |         |           |
| <b>7. Measurement error</b>                                                                                                               | rater 1 | rater 2 | Consensus | rater 1 | rater 2 | Consensus | rater 1 | rater 2 | Consensus |
| 1 Were patients stable in the interim period on the construct to be measured?                                                             |         |         |           |         |         |           |         |         |           |
| 2 Was the time interval appropriate?                                                                                                      |         |         |           |         |         |           |         |         |           |

|                                        |                                                                                                                                               |  |  |   |  |  |  |  |  |
|----------------------------------------|-----------------------------------------------------------------------------------------------------------------------------------------------|--|--|---|--|--|--|--|--|
| 3                                      | Were the test conditions similar for the measurements? e.g. type of administration, environment, instructions                                 |  |  |   |  |  |  |  |  |
| 4                                      | For continuous scores: Was the Standard Error of Measurement (SEM), Smallest Detectable Change (SDC) or Limits of Agreement (LoA) calculated? |  |  |   |  |  |  |  |  |
| 5                                      | For dichotomous/nominal/ordinal scores: Was the percentage (positive and negative) agreement calculated?                                      |  |  |   |  |  |  |  |  |
| 6                                      | Were there any other important flaws?                                                                                                         |  |  |   |  |  |  |  |  |
| <b>TOTAL Lowest score of items 1-6</b> |                                                                                                                                               |  |  | v |  |  |  |  |  |

|                                        |                                                                                                      |         |         |           |         |         |           |         |         |           |
|----------------------------------------|------------------------------------------------------------------------------------------------------|---------|---------|-----------|---------|---------|-----------|---------|---------|-----------|
| <b>8. Criterion validity</b>           |                                                                                                      | rater 1 | rater 2 | Consensus | rater 1 | rater 2 | Consensus | rater 1 | rater 2 | Consensus |
| 1                                      | For continuous scores: Were correlations, or the area under the receiver operating curve calculated? |         |         |           |         |         |           |         |         |           |
| 2                                      | For dichotomous scores: Were sensitivity and specificity determined?                                 |         |         |           |         |         |           |         |         |           |
| 3                                      | Were there any other important flaws?                                                                |         |         |           |         |         |           |         |         |           |
| <b>TOTAL Lowest score of items 1-3</b> |                                                                                                      |         |         | v         |         |         |           |         |         |           |

|                                                                                        |                                                                           |         |         |           |         |         |           |         |         |           |
|----------------------------------------------------------------------------------------|---------------------------------------------------------------------------|---------|---------|-----------|---------|---------|-----------|---------|---------|-----------|
| <b>9. Hypotheses testing for construct validity</b>                                    |                                                                           | rater 1 | rater 2 | Consensus | rater 1 | rater 2 | Consensus | rater 1 | rater 2 | Consensus |
| <b>9a. Comparison with other outcome measurement instruments (convergent validity)</b> |                                                                           |         |         |           |         |         |           |         |         |           |
| 1                                                                                      | Is it clear what the comparator instrument(s) measure(s)?                 |         |         |           |         |         |           |         |         |           |
| 2                                                                                      | Were the measurement properties of the comparator instrument(s) adequate? |         |         |           |         |         |           |         |         |           |
| 3                                                                                      | Was the statistical method appropriate for the hypotheses to be tested?   |         |         |           |         |         |           |         |         |           |
| 4                                                                                      | Were there any other important flaws?                                     |         |         |           |         |         |           |         |         |           |
| <b>TOTAL Lowest score of items 1-4</b>                                                 |                                                                           |         |         | v         |         |         |           |         |         |           |

|                                                                                   |                                                                                     |         |         |           |         |         |           |         |         |           |
|-----------------------------------------------------------------------------------|-------------------------------------------------------------------------------------|---------|---------|-----------|---------|---------|-----------|---------|---------|-----------|
| <b>9b. Comparison between subgroups (discriminative or known-groups validity)</b> |                                                                                     | rater 1 | rater 2 | Consensus | rater 1 | rater 2 | Consensus | rater 1 | rater 2 | Consensus |
| 5                                                                                 | Was an adequate description provided of important characteristics of the subgroups? |         |         |           |         |         |           |         |         |           |
| 6                                                                                 | Was the statistical method appropriate for the hypotheses to be tested?             |         |         |           |         |         |           |         |         |           |
| 7                                                                                 | Were there any other important flaws?                                               |         |         |           |         |         |           |         |         |           |
| <b>TOTAL Lowest score of items 5-7</b>                                            |                                                                                     |         |         | v         |         |         |           |         |         |           |

|                                                                     |                                                                                                                                       |         |         |           |         |         |           |         |         |           |
|---------------------------------------------------------------------|---------------------------------------------------------------------------------------------------------------------------------------|---------|---------|-----------|---------|---------|-----------|---------|---------|-----------|
| <b>10. Responsiveness</b>                                           |                                                                                                                                       | rater 1 | rater 2 | Consensus | rater 1 | rater 2 | Consensus | rater 1 | rater 2 | Consensus |
| <b>10a. Criterion approach (i.e. comparison to a gold standard)</b> |                                                                                                                                       |         |         |           |         |         |           |         |         |           |
| 1                                                                   | For continuous scores: Were correlations between change scores, or the area under the Receiver Operator Curve (ROC) curve calculated? |         |         |           |         |         |           |         |         |           |
| 2                                                                   | For dichotomous scales: Were sensitivity and specificity (changed versus not changed) determined?                                     |         |         |           |         |         |           |         |         |           |
| 3                                                                   | Were there any other important flaws?                                                                                                 |         |         |           |         |         |           |         |         |           |
| <b>TOTAL Lowest score of items 1-3</b>                              |                                                                                                                                       |         |         | v         |         |         |           |         |         |           |

|                                                                                                                 |                                                                           |         |         |           |         |         |           |         |         |           |
|-----------------------------------------------------------------------------------------------------------------|---------------------------------------------------------------------------|---------|---------|-----------|---------|---------|-----------|---------|---------|-----------|
| <b>10b. Construct approach (i.e. hypotheses testing; comparison with other outcome measurement instruments)</b> |                                                                           | rater 1 | rater 2 | Consensus | rater 1 | rater 2 | Consensus | rater 1 | rater 2 | Consensus |
| 4                                                                                                               | Is it clear what the comparator instrument(s) measure(s)?                 |         |         |           |         |         |           |         |         |           |
| 5                                                                                                               | Were the measurement properties of the comparator instrument(s) adequate? |         |         |           |         |         |           |         |         |           |
| 6                                                                                                               | Was the statistical method appropriate for the hypotheses to be tested?   |         |         |           |         |         |           |         |         |           |
| 7                                                                                                               | Were there any other important flaws?                                     |         |         |           |         |         |           |         |         |           |
| <b>TOTAL Lowest score of items 4-7</b>                                                                          |                                                                           |         |         | v         |         |         |           |         |         |           |

|                                                                                         |                                                                                     |         |         |           |         |         |           |         |         |           |
|-----------------------------------------------------------------------------------------|-------------------------------------------------------------------------------------|---------|---------|-----------|---------|---------|-----------|---------|---------|-----------|
| <b>10c. Construct approach: (i.e. hypotheses testing; comparison between subgroups)</b> |                                                                                     | rater 1 | rater 2 | Consensus | rater 1 | rater 2 | Consensus | rater 1 | rater 2 | Consensus |
| 8                                                                                       | Was an adequate description provided of important characteristics of the subgroups? |         |         |           |         |         |           |         |         |           |
| 9                                                                                       | Was the statistical method appropriate for the hypotheses to be tested?             |         |         |           |         |         |           |         |         |           |
| 10                                                                                      | Were there any other important flaws?                                               |         |         |           |         |         |           |         |         |           |



| TOTAL <i>Lowest score of items 8-10</i>                                           |                                                                         |         |         | v         |         |         |           |         |         |           |
|-----------------------------------------------------------------------------------|-------------------------------------------------------------------------|---------|---------|-----------|---------|---------|-----------|---------|---------|-----------|
| 10d. Construct approach: (i.e. hypotheses testing: before and after intervention) |                                                                         | rater 1 | rater 2 | Consensus | rater 1 | rater 2 | Consensus | rater 1 | rater 2 | Consensus |
| 11                                                                                | Was an adequate description provided of the intervention given?         |         |         |           |         |         |           |         |         |           |
| 12                                                                                | Was the statistical method appropriate for the hypotheses to be tested? |         |         |           |         |         |           |         |         |           |
| 13                                                                                | Were there any other important flaws?                                   |         |         |           |         |         |           |         |         |           |
| TOTAL <i>Lowest score of items 11-13</i>                                          |                                                                         |         |         | v         |         |         |           |         |         |           |

**Rating the measurement properties of the PROM**

Use one Table per PROM

Add additional columns (studies) if necessary

| PROM                    | Study 1 |         |           | Study 2 |         |           | Study 3 |         |           | OVERALL        |                |                |                               |                               |                               |  |
|-------------------------|---------|---------|-----------|---------|---------|-----------|---------|---------|-----------|----------------|----------------|----------------|-------------------------------|-------------------------------|-------------------------------|--|
|                         | RATING  | RATING  | RATING    | RATING  | RATING  | RATING    | RATING  | RATING  | RATING    | OVERALL RATING | OVERALL RATING | OVERALL RATING | QUALITY OF EVIDENCE           | QUALITY OF EVIDENCE           | QUALITY OF EVIDENCE           |  |
|                         | +/-/?   | +/-/?   | +/-/?     | +/-/?   | +/-/?   | +/-/?     | +/-/?   | +/-/?   | +/-/?     | +/-/±/?        | +/-/±/?        | +/-/±/?        | High, moderate, low, very low | High, moderate, low, very low | High, moderate, low, very low |  |
|                         | rater 1 | rater 2 | consensus | rater 1 | rater 2 | consensus | rater 1 | rater 2 | consensus | rater 1        | rater 2        | consensus      | rater 1                       | rater 2                       | consensus                     |  |
| Structural validity     |         |         |           |         |         |           |         |         |           |                |                |                |                               |                               |                               |  |
| Internal consistency    |         |         |           |         |         |           |         |         |           |                |                |                |                               |                               |                               |  |
| Cross-cultural validity |         |         |           |         |         |           |         |         |           |                |                |                |                               |                               |                               |  |
| Measurement invariance  |         |         |           |         |         |           |         |         |           |                |                |                |                               |                               |                               |  |
| Reliability             |         |         |           |         |         |           |         |         |           |                |                |                |                               |                               |                               |  |
| Measurement error       |         |         |           |         |         |           |         |         |           |                |                |                |                               |                               |                               |  |
| Criterion validity      |         |         |           |         |         |           |         |         |           |                |                |                |                               |                               |                               |  |
| Construct validity      |         |         |           |         |         |           |         |         |           |                |                |                |                               |                               |                               |  |
| Responsiveness          |         |         |           |         |         |           |         |         |           |                |                |                |                               |                               |                               |  |

| PROM                    | Study 1 |         |           | Study 2 |         |           | Study 3 |         |           | OVERALL        |                |                |                               |                               |                               |  |
|-------------------------|---------|---------|-----------|---------|---------|-----------|---------|---------|-----------|----------------|----------------|----------------|-------------------------------|-------------------------------|-------------------------------|--|
|                         | RATING  | RATING  | RATING    | RATING  | RATING  | RATING    | RATING  | RATING  | RATING    | OVERALL RATING | OVERALL RATING | OVERALL RATING | QUALITY OF EVIDENCE           | QUALITY OF EVIDENCE           | QUALITY OF EVIDENCE           |  |
|                         | +/-/?   | +/-/?   | +/-/?     | +/-/?   | +/-/?   | +/-/?     | +/-/?   | +/-/?   | +/-/?     | +/-/±/?        | +/-/±/?        | +/-/±/?        | High, moderate, low, very low | High, moderate, low, very low | High, moderate, low, very low |  |
|                         | rater 1 | rater 2 | consensus | rater 1 | rater 2 | consensus | rater 1 | rater 2 | consensus | rater 1        | rater 2        | consensus      | rater 1                       | rater 2                       | consensus                     |  |
| Structural validity     |         |         |           |         |         |           |         |         |           |                |                |                |                               |                               |                               |  |
| Internal consistency    |         |         |           |         |         |           |         |         |           |                |                |                |                               |                               |                               |  |
| Cross-cultural validity |         |         |           |         |         |           |         |         |           |                |                |                |                               |                               |                               |  |
| Measurement invariance  |         |         |           |         |         |           |         |         |           |                |                |                |                               |                               |                               |  |
| Reliability             |         |         |           |         |         |           |         |         |           |                |                |                |                               |                               |                               |  |
| Measurement error       |         |         |           |         |         |           |         |         |           |                |                |                |                               |                               |                               |  |
| Criterion validity      |         |         |           |         |         |           |         |         |           |                |                |                |                               |                               |                               |  |
| Construct validity      |         |         |           |         |         |           |         |         |           |                |                |                |                               |                               |                               |  |
| Responsiveness          |         |         |           |         |         |           |         |         |           |                |                |                |                               |                               |                               |  |
